# Supplementary material for: Community prevalence of antibodies to SARS-CoV-2 and correlates of protective immunity in an Indian metropolitan city
Source: bioRxiv or medRxiv preprint supplement (doi:10.1101/2020.11.17.20228155), 2020-11-30
Supplement: Supplementary file [file media-1.pdf]

## APPENDIX

### Community prevalence of antibodies to SARS-CoV-2 and correlates of protective immunity in five localities in an Indian metropolitan city.

#### Authors

Aurnab Ghose, PhD<sup>1,\*#</sup>; Sankar Bhattacharya, PhD<sup>2</sup>; Arun S. Karthikeyan, PhD<sup>3</sup>; Abhay Kudale, PhD<sup>4</sup>; Joy M. Monteiro, PhD<sup>5</sup>; Aparna Joshi, MTech<sup>6</sup>; Guruprasad Medigeshi, PhD<sup>2</sup>; Gagandeep Kang, PhD<sup>3</sup>; Vineeta Bal, MD<sup>1</sup>; Satyajit Rath, MD<sup>1</sup>; L. S. Shashidhara, PhD<sup>1,6,\*</sup>; Jacob John, PhD<sup>7,\*</sup>; Susmita Chaudhuri, PhD<sup>2,\*</sup>; Aarti Nagarkar, PhD<sup>4,\*</sup>

*\* Joint senior author*

#### Affiliations

1. Biology, Indian Institute of Science Education and Research (IISER) Pune, Dr. Homi Bhabha Road, Pune 411008, India
2. Translational Health Science and Technology Institute (THSTI), NCR Biotech Science Cluster, 3rd Milestone, Gurgaon-Faridabad Expressway, Faridabad 121001, India
3. The Wellcome Trust Research Laboratory, Division of Gastrointestinal Sciences, Christian Medical College Vellore (CMC) Vellore, Ida Scudder Road, Vellore, Tamil Nadu 632002, India
4. Interdisciplinary School of Health Sciences, Savitribai Phule Pune University (SPPU), Ganeshkhind, Pune 411007, India
5. Earth and Climate Sciences, Indian Institute of Science Education and Research (IISER) Pune, Dr. Homi Bhabha Road, Pune 411008, India
6. Climate Change Education Programme, Indian Institute of Science Education and Research (IISER) Pune, Dr. Homi Bhabha Road, Pune 411008, India
6. Biology, Ashoka University, Sonapat 131029, India
7. Department of Community Health, Christian Medical College Vellore (CMC) Vellore, Ida Scudder Road, Vellore, Tamil Nadu 632002, India

# **Corresponding Author:** Dr. Aurnab Ghose

[aur nab@iiserpune.ac.in](mailto:aur nab@iiserpune.ac.in)

## CONTENTS

|                                                               |   |
|---------------------------------------------------------------|---|
| <b>Supplementary methods</b>                                  | 3 |
| Variables, data sources, and bias                             | 3 |
| Statistical tests and software                                | 3 |
| <b>Supplementary data</b>                                     | 4 |
| Supplementary Table 1: Factors associated with seropositivity | 4 |
| <b>Acknowledgement of non-author contributions</b>            | 5 |

## Supplementary methods

### *Variables, data sources, and bias*

We obtained demographic and household characteristics and collected information on potential risk factors including occupation, exposure to SARS CoV-2 including travel history during the lockdown period, experience of symptoms and history of quarantine. These data were collected independent of serology using a standardized questionnaire at the initial survey.

### *Statistical tests and software*

Analyses were performed using STATA v14.2 13.1, R Statistical Software v2.14.0 and GraphPad Prism v8.1.2. Spearman's non-parametric correlation analysis was done for dual datasets. Mann-Whitney test or Kruskal-Wallis ANOVA with Dunn's post-test was used to compare across groups. SPSS was used for regression analysis of sex and age data with serological tests and categorical comparisons made using the Chi-square test.

Box-and-whisker plots: the box extends from the 25th to 75th percentiles with the median indicated by a line. The whiskers mark the 5th and 95th percentiles.

**Supplementary Table 1: Factors associated with seropositivity**

|                              | Unadjusted               |              | Adjusted                 |              |
|------------------------------|--------------------------|--------------|--------------------------|--------------|
|                              | OR (95% CI)              | p-value      | OR (95%CI)               | p-value      |
| <b>Age category (years)</b>  |                          |              |                          |              |
| 18-30                        | 1                        |              | 1                        |              |
| 31-50                        | 1.04 (0.76, 1.40)        | 0.767        | 1.00 (0.71, 1.41)        | 0.990        |
| 51-65                        | 1.14 (0.72, 1.80)        | 0.488        | 1.07 (0.61, 1.86)        | 0.758        |
| >65                          | <b>0.59 (0.35, 0.99)</b> | <b>0.047</b> | <b>0.59 (0.36, 0.98)</b> | <b>0.044</b> |
| <b>Gender</b>                |                          |              |                          |              |
| Male                         | 1                        |              | 1                        |              |
| Female                       | 0.89 (0.71, 1.11)        | 0.209        | 0.86 (0.69, 1.07)        | 0.134        |
| <b>High school education</b> |                          |              |                          |              |
| Completed                    | 1                        |              | 1                        |              |
| Not completed                | <b>1.74 (1.21, 2.49)</b> | <b>0.013</b> | 1.26 (0.92, 1.74)        | 0.112        |
| <b>Type of dwelling</b>      |                          |              |                          |              |
| Non-slums                    | 1                        |              | 1                        |              |
| Slums                        | <b>2.77 (1.88, 4.07)</b> | <b>0.002</b> | <b>1.91 (1.34, 2.73)</b> | <b>0.007</b> |
| <b>Family size</b>           |                          |              |                          |              |
| < 2                          | 1                        |              |                          |              |
| 2 to 5                       | 1.40 (0.81, 2.41)        | 0.159        |                          |              |
| > 5                          | 1.97 (0.94, 4.11)        | 0.063        |                          |              |
| <b>Floor area per person</b> |                          |              |                          |              |
| >10 m <sup>2</sup>           | 1                        |              | 1                        |              |
| 5-9 m <sup>2</sup>           | <b>2.00 (1.13, 3.54)</b> | <b>0.028</b> | 1.53 (0.92, 2.56)        | 0.082        |
| < 5 m <sup>2</sup>           | <b>3.12 (2.00, 4.86)</b> | <b>0.002</b> | <b>2.09 (1.43, 3.04)</b> | <b>0.004</b> |
| <b>Shared toilet</b>         | 1.95 (1.33, 2.85)        | 0.008        | 1.12 (0.83, 1.53)        | 0.353        |
| <b>History of symptoms</b>   | 1.63 (0.89, 3.01)        | 0.090        | 1.54 (0.88, 2.69)        | 0.099        |
| <b>History of COVID-19</b>   | 9.30 (0.95, 91.11)       | 0.053        |                          |              |

## Acknowledgement of non-author contributions

The authors acknowledge the following individuals for technical support.

| Name                 | Affiliation                                  | Role                                    |
|----------------------|----------------------------------------------|-----------------------------------------|
| Kajal Medipilwar     | SPPU Pune                                    | Sample collection                       |
| Sanika More          | SPPU Pune                                    | Sample collection                       |
| Majed Hussain        | SPPU Pune                                    | Sample collection                       |
| Snehal Kulkarni      | SPPU Pune                                    | Field data management and analysis      |
| Amruta Kulkarni      | SPPU Pune                                    | Field data management and analysis      |
| Ketakee Ghate        | IISER Pune                                   | Sample processing                       |
| Sanket Nagarkar      | IISER Pune                                   | Sample processing                       |
| Dhriti Nagar         | IISER Pune                                   | Sample processing                       |
| Devika Bodas         | IISER Pune                                   | Sample processing                       |
| Pooja Vaid           | IISER Pune                                   | Sample processing                       |
| Madhura Kulkarni     | Prashanti Cancer Care Mission Pune           | Sample processing                       |
| Devdatta Tengshe     | GeoSpoc Geospatial Services Pvt. Ltd.        | Geospatial mapping                      |
| Rahul Chopra         | Independent researcher, formerly IISER Pune. | Geospatial mapping                      |
| Subhash Tanwar       | THSTI Faridabad                              | Serological assays                      |
| Manisha Yadav        | THSTI Faridabad                              | Serological assays                      |
| Simran Babbar        | THSTI Faridabad                              | Serological assays                      |
| Himakshi Sidhar      | THSTI Faridabad                              | Serological assays                      |
| Imran Khan           | THSTI Faridabad                              | Serological assays                      |
| Chanchal Sharma      | THSTI Faridabad                              | Serological assays                      |
| Sudipta Deepak Sonar | THSTI Faridabad                              | Serological assays                      |
| Kamini Jakhar        | THSTI Faridabad                              | Serological assays                      |
| Mahima Tiwari        | THSTI Faridabad                              | Resource support for serological assays |
| Deepak Chaurasiya    | THSTI Faridabad                              | Resource support for serological assays |
| Shailendra Mani      | THSTI Faridabad                              | Resource support for serological assays |
| Tripti Srivastava    | THSTI Faridabad                              | Resource support for serological assays |
| Sneha Bhogale        | Pune Knowledge Cluster Pune                  | Public data compilation                 |
| Ashwini Keskar       | Pune Knowledge Cluster Pune                  | Public data compilation                 |
| Bhalchandra Pujari   | SPPU Pune                                    | Public data analysis                    |
| Sarika Bhattacharya  | NCL Pune                                     | Public data analysis                    |
| Anu Raghunathan      | NCL Pune                                     | Public data analysis                    |
| Shilpa Jain          | IISER Pune                                   | Administrative management               |
